# Supplementary material for: Electrochemical reduction of N,N′-thiobisphthalimide and N,N′-dithiobisphthalimide: ejection of diatomic sulfur through an autocatalytic mechanism
Source: Royal Society of Chemistry journal article supplement (doi:10.1039/c4cp03219e), 2014-09-05
Supplement: c4cp03219e1.pdf [file c4cp03219e1.pdf]

**Electrochemical Reduction of N,N'-Thiobisphthalimide and N,N'-Dithiobisphthalimide:  
Ejection of Diatomic Sulfur Through an Autocatalytic Mechanism**

Emad M. Hamed, Kallum, M. Koczkur and Abdelaziz Houmam\*

**Supporting Information**

- I. Application of the extensions of the dissociative electron transfer theory to the case of decomposition of radical anions**
- II. Cyclic Voltammetry**
- III. Computational calculations (method, structures, energies, LUMOs and coordinates)**

## I. Application of the extensions of the dissociative electron transfer theory to the case of decomposition of radical anions

When applying the extensions of the dissociative electron transfer theory to the case of dissociation radical anions, it is important to know the cleavage mechanism. Two possibilities are to be considered. If the cleavage takes place without the transfer of the extra electron from one group to another within the radical anion structure, the cleavage is homolytic. If the cleavage is accompanied by the internal electron transfer of the electron the cleavage is heterolytic.

In the present case, the extra electron resides in the phthalimidyl group for both radical anions (**1**<sup>-</sup> and **2**<sup>-</sup>) and the cleavage leads to the formation of the phthalimidyl anion, so without an intramolecular electron transfer, through a homolytic mechanism.

The activation free energy is similar for both the homolytic and the heterolytic mechanisms. Below are is the general expression showing the involved parameters (eq. 1) for a radical anion (RX<sup>-•</sup>) cleaving to an anion (X<sup>-</sup>) and a radical (R<sup>•</sup>). The intrinsic barrier on the other hand is different from one mechanism to the other. The main difference resides in the involvement of the standard potential of the leaving group (the anion product of the radical anion cleavage) in one case and in that of the other moiety (the radical product of the radical anion cleavage) in the other case. The expressions for the cleavage for both mechanisms are provided below (eqs. 2 and 3).

For a radical anion (RX<sup>-•</sup>) cleaving through a homolytic mechanism to yield R<sup>•</sup> and X<sup>-</sup>, using the extension of the dissociative electron transfer theory to the case of radical anion dissociation, the thermodynamics of the intramolecular homolytic ET could be described by eq.1:

$$\Delta G^0 = E - E_{RX/R^{\bullet}+X^-}^0 = E + D_{R-X} - E_{X^{\bullet}/X^-}^0 - T\Delta S_{RX/R^{\bullet}+X^-} \quad (1)$$

E is the electrode potential,  $E_{RX/R^{\bullet}+X^-}^0$  the standard potential of the RX/R<sup>•</sup>+X<sup>-</sup> couple,  $D_{R-X}$  the bond dissociation energy of the cleaved bond,  $E_{X^{\bullet}/X^-}^0$  the standard potential of the X<sup>•</sup>/X<sup>-</sup> couple and  $\Delta S_{RX/R^{\bullet}+X^-}$  the entropy of the homolytic dissociation reaction.

The intrinsic barrier for the homolytic decomposition of  $\mathbf{1}\cdot$  is described by eq. 2, which depends on the oxidation potential of the leaving group  $E^0_{X/(X)\cdot-}$ , the standard reduction potential of  $\mathbf{1}$ , the bond dissociation energy of the N-SO<sub>2</sub> bond at the level of  $\mathbf{1}$  ( $D_{RX}$ ), and the entropy variation. Here RX represents the initial compound where X represents the phthalimidyl group. The  $(X)\cdot^-$  represents an excited state of the phthalimidyl anion ( $X^-$ ) that results from the injection of an electron into the low lying phthalimidyl radical orbital.

$$\Delta G^{\ddagger}_{0,RX\cdot-/R+X^-} = \frac{1}{4} \left( D_{R-X} + E^0_{RX/RX^-} - E^0_{X/(X)\cdot-} + T\Delta\bar{S}_{RX\cdot-/R+X^-} \right) + \frac{\lambda_0}{4} \quad (2)$$

For a heterolytic cleavage the intrinsic barrier is provided by eq. 3. In this case, the equation involves the standard oxidation potential  $E^0_{R/(R)\cdot-}$ , where  $(R)\cdot^-$  represents an excited state of the anion ( $R^-$ ).

$$\Delta G^{\ddagger}_{0,RX\cdot-/R+X^-} = \frac{1}{4} \left( D_{R-X} + E^0_{RX/RX^-} - E^0_{R/(R)\cdot-} + T\Delta\bar{S}_{RX\cdot-/R+X^-} \right) + \frac{\lambda_0}{4} \quad (3)$$

## II. Cyclic Voltammetry

Cyclic voltammetry of  $N,N'$ -dithiobisphthalimide (**1**) and  $N,N'$ -thiobisphthalimide (**2**):

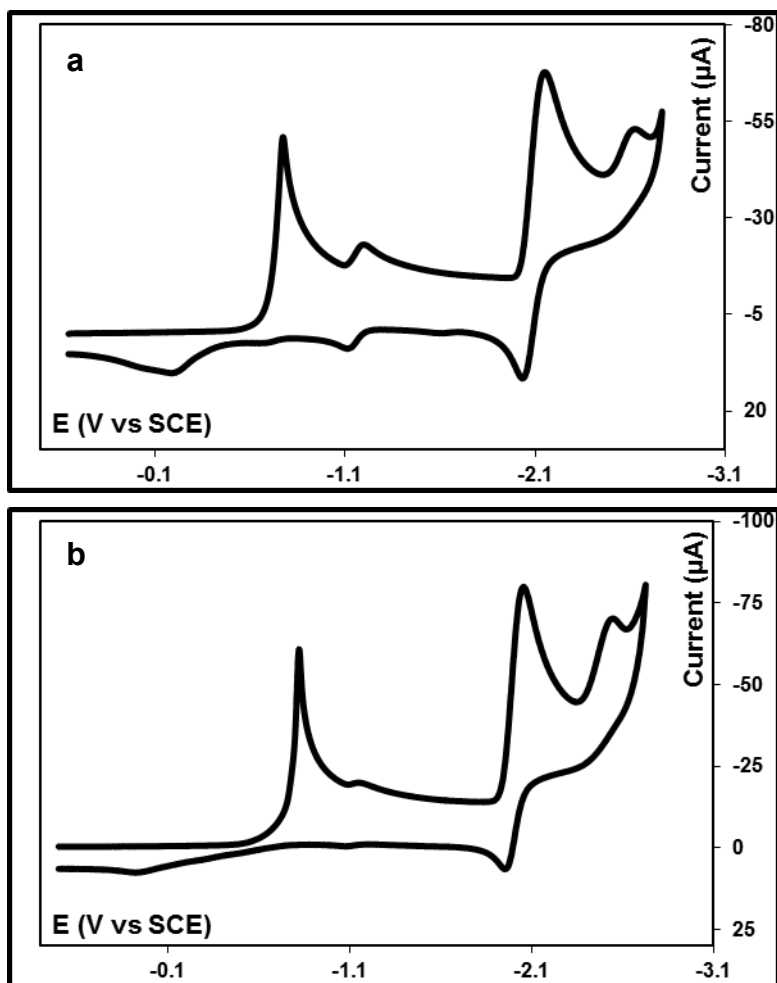

**Figure S1.** Cyclic voltammetry in  $\text{CH}_3\text{CN} + \text{nBu}_4\text{NPF}_6$  (0.1 M), at a glassy carbon electrode and at 0.2 V/s, of (a)  $N,N'$ -dithiobisphthalimide (1.1 mM), and (b)  $N,N'$ -thiobisphthalimide (1.05 mM).

The effects of the scan rate and the concentration on the cyclic voltammetry of  $N,N'$ -thiobisphthalimide (**2**) were investigated. Figure S2 shows the cyclic voltammograms of  $N,N'$ -thiobisphthalimide (**2**) at a low concentration (1.05 mM) at scan rates ranging from 0.2 V/s to 40 V/s. The trace crossing observed at low scan rates disappears at higher scan rates. It is also important to note that the second reversible peak also disappears when the scan rate is high

indicating that the short time scale of the cyclic voltammetry, under these conditions, does not allow formation of the product responsible for this second peak.

Figure S3 shows a comparison of how the scan rate affects the cyclic voltammogram of *N,N'*-dithiobisphthalimide (**1**) at two different concentration (1.1 mM and 2.13 mM). The figure clearly shows that while the trace crossing totally disappears at 10 V/s for the low concentration, it is still clearly visible at the same scan rate at the higher concentration.

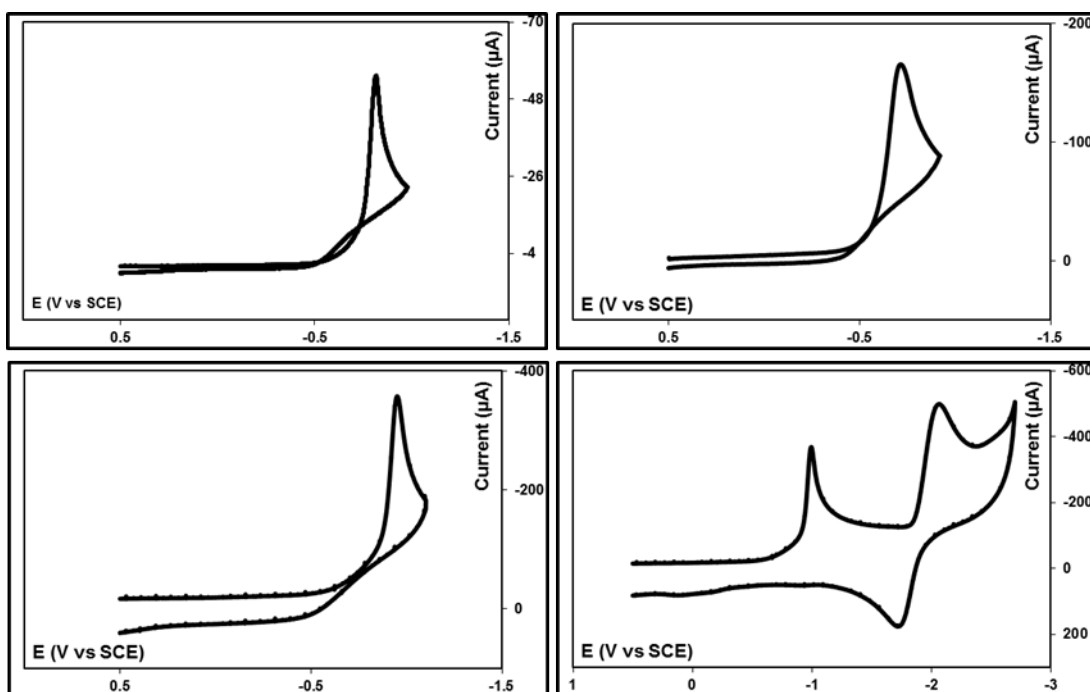

**Figure S2.** Cyclic voltammetry of *N,N'*-thiobisphthalimide (**1**: 1.05 mM) in  $\text{CH}_3\text{CN} + \text{NBu}_4\text{PF}_6$  (0.1 M), at a glassy carbon electrode and at (a) 0.2 V/s; (b) 3.6 V/s; (c) 10 V/s and (d) 10 V/s.

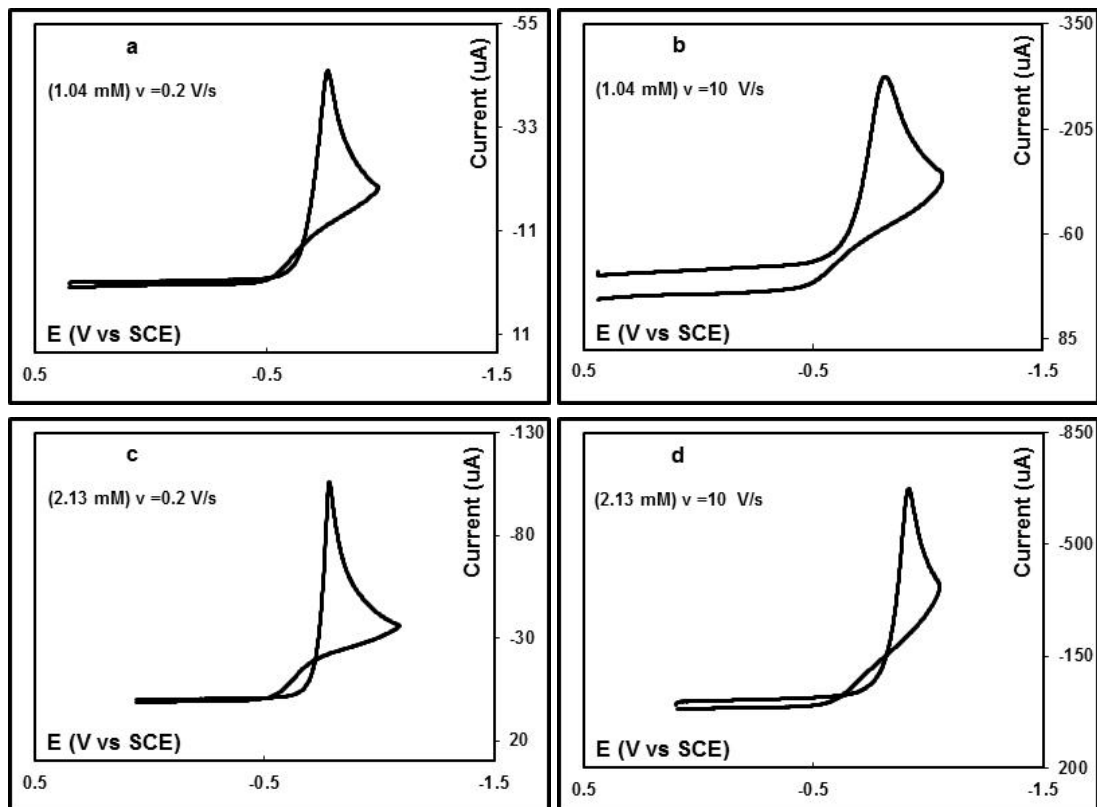

**Figure S3.** Cyclic voltammetry of  $N,N'$ -dithiobisphthalimide (**1**) in  $\text{CH}_3\text{CN} + n\text{Bu}_4\text{NPF}_6$  (0.1 M), at a glassy carbon electrode and at (a) 1.04 mM and 0.2 V/s; (b) 1.04 mM and 10 V/s; (c) 2.13 mM and 0.2 V/s and (d) 1.04 mM and (d) 10 V/s.

## Theoretical Calculations.

All of the calculations were performed using the Gaussian 09 software package.<sup>1</sup> The B3LYP method,<sup>2</sup> with the 6-31G+(d,p) basis set was used starting from preliminary optimizations performed with semi-empirical methods. LUMO orbitals and SOMO orbitals were calculated after a full optimization without imposed symmetry of the conformations. Minimum energy structures were fully optimized and the obtained conformations were checked by running frequency calculations. No imaginary vibrational frequencies were seen.

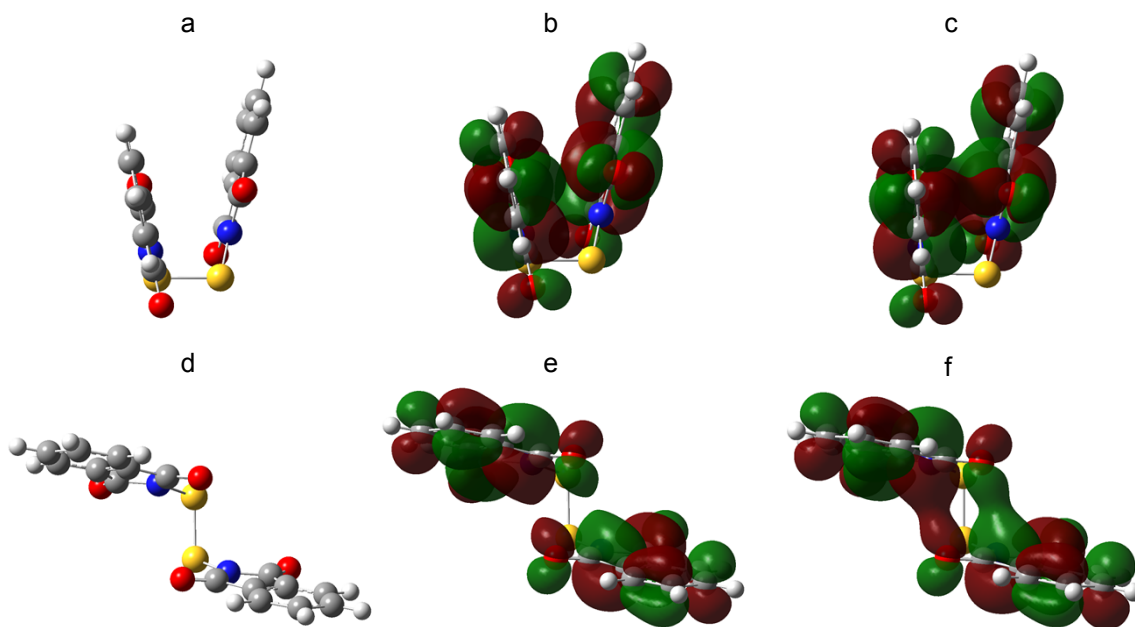

**Figure S4.** Optimized structures of N,N'-dithiobisphthalimide (a and d), its corresponding LUMO (b and e) and the SOMO of its radical anion (c and f).

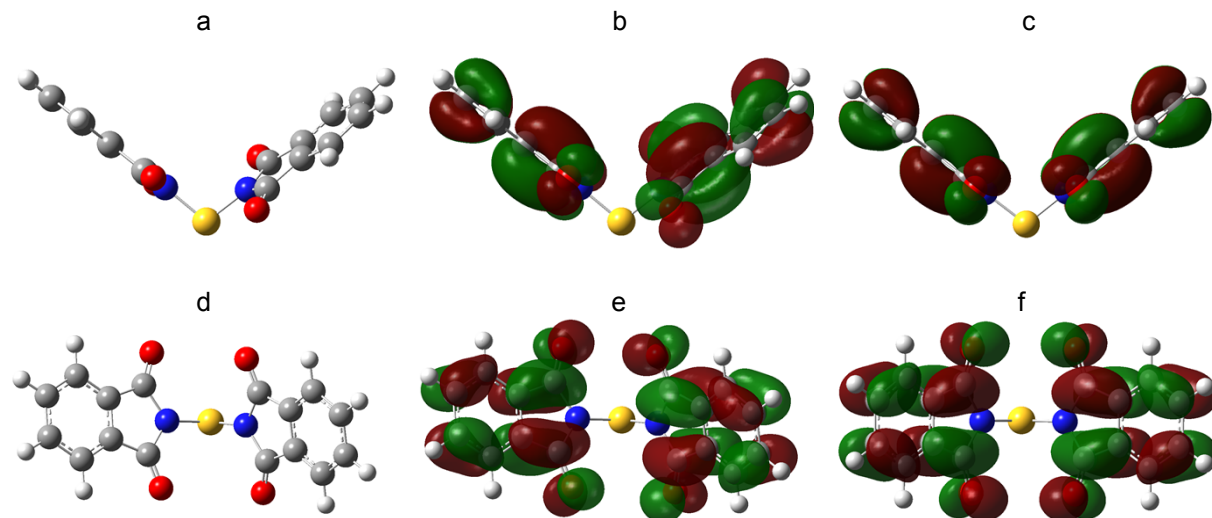

**Figure S5.** Optimized structures of N,N'-thiobisphthalimide (a and d), its corresponding LUMO (b and e) and the SOMO of its radical anion (c and f).



## Total Energies and Coordinates:

### N,N'-Dithiobisphthalimide

Total Energy: -1821.38913152 a.u.

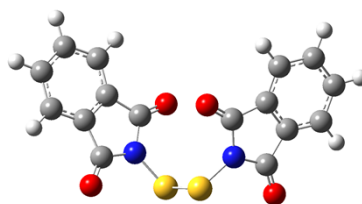

| Center Number | Atomic Number | Atomic Type | Coordinates (Angstroms) |           |           |
|---------------|---------------|-------------|-------------------------|-----------|-----------|
|               |               |             | X                       | Y         | Z         |
| 1             | 6             | 0           | 3.697005                | -0.095124 | 0.102241  |
| 2             | 6             | 0           | 2.886157                | -1.030647 | -0.545703 |
| 3             | 6             | 0           | 3.280722                | -2.354632 | -0.694138 |
| 4             | 6             | 0           | 4.527283                | -2.718102 | -0.167965 |
| 5             | 6             | 0           | 5.341149                | -1.778836 | 0.482985  |
| 6             | 6             | 0           | 4.934467                | -0.445884 | 0.627884  |
| 7             | 6             | 0           | 3.005166                | 1.223657  | 0.106201  |
| 8             | 6             | 0           | 1.633999                | -0.358948 | -0.989069 |
| 9             | 1             | 0           | 2.642076                | -3.073471 | -1.196727 |
| 10            | 1             | 0           | 4.870285                | -3.743912 | -0.262876 |
| 11            | 1             | 0           | 6.301299                | -2.092263 | 0.881472  |
| 12            | 1             | 0           | 5.554905                | 0.288435  | 1.131035  |
| 13            | 16            | 0           | 0.587083                | 2.209216  | -0.860241 |
| 14            | 16            | 0           | -0.586964               | 2.209055  | 0.860220  |
| 15            | 6             | 0           | -3.005194               | 1.223651  | -0.106065 |
| 16            | 6             | 0           | -1.633783               | -0.359157 | 0.988589  |
| 17            | 6             | 0           | -3.697107               | -0.095095 | -0.102059 |
| 18            | 6             | 0           | -2.886109               | -1.030744 | 0.545520  |
| 19            | 6             | 0           | -4.934741               | -0.445727 | -0.627381 |
| 20            | 6             | 0           | -3.280691               | -2.354729 | 0.693897  |
| 21            | 6             | 0           | -5.341440               | -1.778682 | -0.482539 |
| 22            | 1             | 0           | -5.555299               | 0.288687  | -1.130245 |
| 23            | 6             | 0           | -4.527425               | -2.718072 | 0.168043  |
| 24            | 1             | 0           | -2.641930               | -3.073665 | 1.196200  |
| 25            | 1             | 0           | -6.301723               | -2.092010 | -0.880783 |
| 26            | 1             | 0           | -4.870443               | -3.743879 | 0.262916  |
| 27            | 7             | 0           | 1.777645                | 1.004555  | -0.591454 |
| 28            | 7             | 0           | -1.777518               | 1.004407  | 0.591271  |
| 29            | 8             | 0           | 3.364974                | 2.275482  | 0.582557  |
| 30            | 8             | 0           | 0.678293                | -0.826037 | -1.566601 |
| 31            | 8             | 0           | -0.677965               | -0.826346 | 1.565868  |
| 32            | 8             | 0           | -3.365143               | 2.275581  | -0.582077 |

## N,N'-Dithiobisphthalimide Radical Anion

Total Energy: -1821.44795991 a.u.

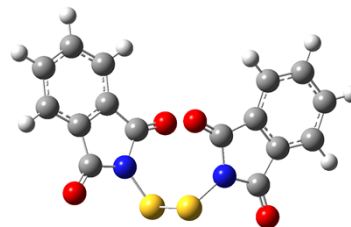

| Center Number | Atomic Number | Atomic Type | Coordinates (Angstroms) |           |           |
|---------------|---------------|-------------|-------------------------|-----------|-----------|
|               |               |             | X                       | Y         | Z         |
| 1             | 6             | 0           | 3.509386                | -0.148113 | 0.051334  |
| 2             | 6             | 0           | 2.578238                | -1.038440 | -0.535290 |
| 3             | 6             | 0           | 2.857575                | -2.406694 | -0.624110 |
| 4             | 6             | 0           | 4.069747                | -2.867350 | -0.115115 |
| 5             | 6             | 0           | 4.999243                | -1.976803 | 0.476203  |
| 6             | 6             | 0           | 4.723984                | -0.612077 | 0.561752  |
| 7             | 6             | 0           | 2.965656                | 1.214494  | 0.013711  |
| 8             | 6             | 0           | 1.411711                | -0.285858 | -0.991335 |
| 9             | 1             | 0           | 2.136539                | -3.083179 | -1.073015 |
| 10            | 1             | 0           | 4.306920                | -3.926980 | -0.165831 |
| 11            | 1             | 0           | 5.935274                | -2.365331 | 0.868773  |
| 12            | 1             | 0           | 5.427256                | 0.081031  | 1.014378  |
| 13            | 16            | 0           | 0.583372                | 2.347997  | -0.870398 |
| 14            | 16            | 0           | -0.583327               | 2.347947  | 0.870443  |
| 15            | 6             | 0           | -2.965637               | 1.214512  | -0.013690 |
| 16            | 6             | 0           | -1.411716               | -0.285900 | 0.991329  |
| 17            | 6             | 0           | -3.509387               | -0.148076 | -0.051341 |
| 18            | 6             | 0           | -2.578267               | -1.038434 | 0.535299  |
| 19            | 6             | 0           | -4.723986               | -0.612012 | -0.561788 |
| 20            | 6             | 0           | -2.857653               | -2.406682 | 0.624117  |
| 21            | 6             | 0           | -4.999288               | -1.976727 | -0.476239 |
| 22            | 1             | 0           | -5.427232               | 0.081117  | -1.014422 |
| 23            | 6             | 0           | -4.069829               | -2.867302 | 0.115105  |
| 24            | 1             | 0           | -2.136643               | -3.083189 | 1.073031  |
| 25            | 1             | 0           | -5.935324               | -2.365230 | -0.868824 |
| 26            | 1             | 0           | -4.307036               | -3.926925 | 0.165821  |
| 27            | 8             | 0           | 3.443029                | 2.264034  | 0.431591  |
| 28            | 8             | 0           | 0.397879                | -0.655852 | -1.572843 |
| 29            | 8             | 0           | -3.442956               | 2.264067  | -0.431596 |
| 30            | 8             | 0           | -0.397873               | -0.655922 | 1.572815  |
| 31            | 7             | 0           | 1.706451                | 1.083709  | -0.649243 |
| 32            | 7             | 0           | -1.706415               | 1.083683  | 0.649239  |

## N,N'-Thiobisphthalimide

Total Energy: -1423.18691900 a.u.

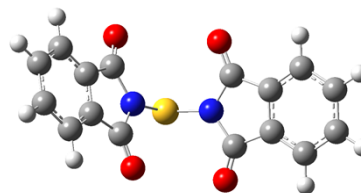

| Center Number | Atomic Number | Atomic Type | Coordinates (Angstroms) |           |           |
|---------------|---------------|-------------|-------------------------|-----------|-----------|
|               |               |             | X                       | Y         | Z         |
| 1             | 6             | 0           | 2.991350                | 0.775642  | 0.438197  |
| 2             | 6             | 0           | 3.232551                | -0.573628 | 0.170530  |
| 3             | 6             | 0           | 4.304919                | -1.247685 | 0.743100  |
| 4             | 6             | 0           | 5.136341                | -0.520877 | 1.604982  |
| 5             | 6             | 0           | 4.894464                | 0.835181  | 1.873323  |
| 6             | 6             | 0           | 3.812141                | 1.506203  | 1.289736  |
| 7             | 6             | 0           | 1.784461                | 1.211723  | -0.317891 |
| 8             | 6             | 0           | 2.196710                | -1.075564 | -0.775485 |
| 9             | 1             | 0           | 4.483085                | -2.296067 | 0.527326  |
| 10            | 1             | 0           | 5.983139                | -1.013028 | 2.073729  |
| 11            | 1             | 0           | 5.558841                | 1.371472  | 2.544121  |
| 12            | 1             | 0           | 3.616338                | 2.554834  | 1.488481  |
| 13            | 16            | 0           | 0.000001                | -0.000181 | -2.087573 |
| 14            | 6             | 0           | -1.784479               | -1.211808 | -0.317670 |
| 15            | 6             | 0           | -2.196713               | 1.075392  | -0.775722 |
| 16            | 6             | 0           | -2.991371               | -0.775566 | 0.438320  |
| 17            | 6             | 0           | -3.232534               | 0.573663  | 0.170422  |
| 18            | 6             | 0           | -3.812179               | -1.505961 | 1.289986  |
| 19            | 6             | 0           | -4.304861               | 1.247856  | 0.742907  |
| 20            | 6             | 0           | -4.894465               | -0.834803 | 1.873483  |
| 21            | 1             | 0           | -3.616398               | -2.554562 | 1.488912  |
| 22            | 6             | 0           | -5.136295               | 0.521220  | 1.604923  |
| 23            | 1             | 0           | -4.483006               | 2.296203  | 0.526948  |
| 24            | 1             | 0           | -5.558843               | -1.370953 | 2.544393  |
| 25            | 1             | 0           | -5.983069               | 1.013483  | 2.073595  |
| 26            | 7             | 0           | 1.337850                | 0.048615  | -1.020577 |
| 27            | 7             | 0           | -1.337818               | -0.048816 | -1.020546 |
| 28            | 8             | 0           | 2.091433                | -2.169391 | -1.274572 |
| 29            | 8             | 0           | 1.254210                | 2.297810  | -0.343971 |
| 30            | 8             | 0           | -2.091414               | 2.169126  | -1.274985 |
| 31            | 8             | 0           | -1.254302               | -2.297922 | -0.343635 |

## N,N'-Thiobisphthalimide Radical Anion

Total Energy: -1423.24155887 a.u.

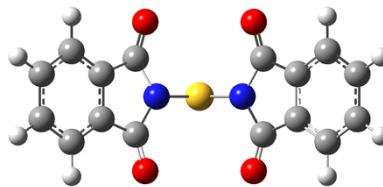

| Center Number | Atomic Number | Atomic Type | Coordinates (Angstroms) |           |           |
|---------------|---------------|-------------|-------------------------|-----------|-----------|
|               |               |             | X                       | Y         | Z         |
| 1             | 6             | 0           | 3.071876                | 0.707527  | 0.307147  |
| 2             | 6             | 0           | 3.072103                | -0.707260 | 0.307213  |
| 3             | 6             | 0           | 4.014240                | -1.423578 | 1.052335  |
| 4             | 6             | 0           | 4.948274                | -0.708400 | 1.800277  |
| 5             | 6             | 0           | 4.948030                | 0.709415  | 1.800230  |
| 6             | 6             | 0           | 4.013755                | 1.424221  | 1.052233  |
| 7             | 6             | 0           | 1.998509                | 1.192517  | -0.565382 |
| 8             | 6             | 0           | 1.998804                | -1.192679 | -0.565167 |
| 9             | 1             | 0           | 4.006150                | -2.509720 | 1.042918  |
| 10            | 1             | 0           | 5.687806                | -1.241124 | 2.392573  |
| 11            | 1             | 0           | 5.687388                | 1.242435  | 2.392478  |
| 12            | 1             | 0           | 4.005324                | 2.510359  | 1.042697  |
| 13            | 16            | 0           | 0.000000                | -0.000450 | -2.097128 |
| 14            | 6             | 0           | -1.998495               | -1.192772 | -0.564848 |
| 15            | 6             | 0           | -1.998808               | 1.192424  | -0.565687 |
| 16            | 6             | 0           | -3.071940               | -0.707398 | 0.307377  |
| 17            | 6             | 0           | -3.072037               | 0.707389  | 0.306987  |
| 18            | 6             | 0           | -4.013925               | -1.423761 | 1.052648  |
| 19            | 6             | 0           | -4.014075               | 1.424039  | 1.051916  |
| 20            | 6             | 0           | -4.948123               | -0.708625 | 1.800427  |
| 21            | 1             | 0           | -4.005583               | -2.509903 | 1.043484  |
| 22            | 6             | 0           | -4.948192               | 0.709190  | 1.800068  |
| 23            | 1             | 0           | -4.005895               | 2.510176  | 1.042126  |
| 24            | 1             | 0           | -5.687536               | -1.241383 | 2.392841  |
| 25            | 1             | 0           | -5.687674               | 1.242176  | 2.392192  |
| 26            | 7             | 0           | 1.348274                | -0.000204 | -1.046014 |
| 27            | 7             | 0           | -1.348272               | -0.000256 | -1.046010 |
| 28            | 8             | 0           | 1.700001                | -2.339237 | -0.868914 |
| 29            | 8             | 0           | 1.699318                | 2.338945  | -0.869198 |
| 30            | 8             | 0           | -1.699871               | 2.338856  | -0.869756 |
| 31            | 8             | 0           | -1.699445               | -2.339325 | -0.868350 |

## Phthalimide Radical

Total Energy: -512.42512800 a.u.

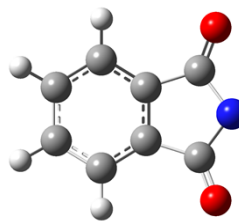

| Center<br>Number | Atomic<br>Number | Atomic<br>Type | Coordinates (Angstroms) |           |           |
|------------------|------------------|----------------|-------------------------|-----------|-----------|
|                  |                  |                | X                       | Y         | Z         |
| 1                | 6                | 0              | -0.144377               | -0.699649 | 0.000012  |
| 2                | 6                | 0              | -0.144288               | 0.699636  | -0.000056 |
| 3                | 6                | 0              | -1.330644               | 1.428942  | 0.000040  |
| 4                | 6                | 0              | -2.526392               | 0.704393  | 0.000207  |
| 5                | 6                | 0              | -2.526477               | -0.704131 | 0.000275  |
| 6                | 6                | 0              | -1.330816               | -1.428821 | 0.000179  |
| 7                | 6                | 0              | 1.279222                | -1.147151 | -0.000137 |
| 8                | 6                | 0              | 1.279373                | 1.146992  | -0.000199 |
| 9                | 1                | 0              | -1.320503               | 2.514014  | -0.000003 |
| 10               | 1                | 0              | -3.474786               | 1.233143  | 0.000298  |
| 11               | 1                | 0              | -3.474934               | -1.232768 | 0.000402  |
| 12               | 1                | 0              | -1.320802               | -2.513894 | 0.000217  |
| 13               | 8                | 0              | 1.707483                | -2.287563 | 0.000111  |
| 14               | 8                | 0              | 1.707864                | 2.287499  | -0.000162 |
| 15               | 7                | 0              | 2.133521                | -0.000178 | -0.000348 |

## Phthalimide Thiyl Radical

Total Energy: -910.66099863 a.u.

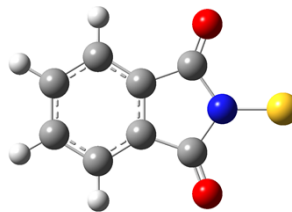

| Center Number | Atomic Number | Atomic Type | Coordinates (Angstroms) |           |           |
|---------------|---------------|-------------|-------------------------|-----------|-----------|
|               |               |             | X                       | Y         | Z         |
| 1             | 6             | 0           | -0.790491               | -0.698985 | 0.000270  |
| 2             | 6             | 0           | -0.790493               | 0.698989  | 0.000206  |
| 3             | 6             | 0           | -1.976405               | 1.425559  | 0.000202  |
| 4             | 6             | 0           | -3.175076               | 0.702022  | 0.000293  |
| 5             | 6             | 0           | -3.175074               | -0.702025 | 0.000360  |
| 6             | 6             | 0           | -1.976400               | -1.425558 | 0.000335  |
| 7             | 6             | 0           | 0.611179                | -1.188620 | 0.000244  |
| 8             | 6             | 0           | 0.611173                | 1.188625  | 0.000136  |
| 9             | 1             | 0           | -1.964312               | 2.510467  | 0.000147  |
| 10            | 1             | 0           | -4.121804               | 1.233514  | 0.000308  |
| 11            | 1             | 0           | -4.121800               | -1.233519 | 0.000423  |
| 12            | 1             | 0           | -1.964302               | -2.510466 | 0.000381  |
| 13            | 7             | 0           | 1.436801                | -0.000003 | -0.000146 |
| 14            | 8             | 0           | 1.025873                | -2.321460 | 0.000010  |
| 15            | 8             | 0           | 1.025875                | 2.321450  | -0.000208 |
| 16            | 16            | 0           | 3.104384                | 0.000003  | -0.000683 |

## PhthalimideSS Radical

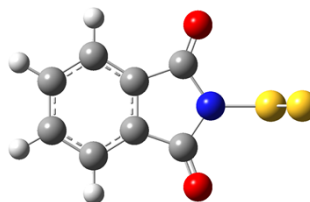

Total Energy: -1308.86531101 a.u.

| Center<br>Number | Atomic<br>Number | Atomic<br>Type | Coordinates (Angstroms) |           |           |
|------------------|------------------|----------------|-------------------------|-----------|-----------|
|                  |                  |                | X                       | Y         | Z         |
| 1                | 6                | 0              | -1.388307               | -0.698831 | -0.052873 |
| 2                | 6                | 0              | -1.388207               | 0.698838  | -0.053007 |
| 3                | 6                | 0              | -2.556113               | 1.425801  | 0.141733  |
| 4                | 6                | 0              | -3.739401               | 0.701577  | 0.339964  |
| 5                | 6                | 0              | -3.739495               | -0.701159 | 0.340130  |
| 6                | 6                | 0              | -2.556308               | -1.425590 | 0.142062  |
| 7                | 6                | 0              | 0.002318                | -1.182363 | -0.283903 |
| 8                | 6                | 0              | 0.002510                | 1.182126  | -0.283987 |
| 9                | 1                | 0              | -2.544777               | 2.510767  | 0.140148  |
| 10               | 1                | 0              | -4.672810               | 1.233564  | 0.496602  |
| 11               | 1                | 0              | -4.672980               | -1.232983 | 0.496881  |
| 12               | 1                | 0              | -2.545127               | -2.510558 | 0.140684  |
| 13               | 16               | 0              | 2.499957                | -0.000328 | -0.710573 |
| 14               | 16               | 0              | 3.397124                | 0.000368  | 1.052553  |
| 15               | 8                | 0              | 0.422295                | -2.315688 | -0.339747 |
| 16               | 8                | 0              | 0.422630                | 2.315372  | -0.340112 |
| 17               | 7                | 0              | 0.785858                | -0.000186 | -0.435404 |

**References**

(1) M. J. Frisch, G. W. Trucks, H. B. Schlegel, G. E. Scuseria, M. A. Robb, J. R. Cheeseman, G. Scalmani, V. Barone, B. Mennucci, G. A. Petersson, H. Nakatsuji, M. Caricato, X. Li, H. P. Hratchian, A. F. Izmaylov, J. Bloino, G. Zheng, J. L. Sonnenberg, M. Hada, M. Ehara, K. Toyota, R. Fukuda, J. Hasegawa, M. Ishida, T. Nakajima, Y. Honda, O. Kitao, H. Nakai, T. Vreven, J. A. Montgomery, Jr., J. E. Peralta, F. Ogliaro, M. Bearpark, J. J. Heyd, E. Brothers, K. N. Kudin, V. N. Staroverov, T. Keith, R. Kobayashi, J. Normand, K. Raghavachari, A. Rendell, J. C. Burant, S. S. Iyengar, J. Tomasi, M. Cossi, N. Rega, J. M. Millam, M. Klene, J. E. Knox, J. B. Cross, V. Bakken, C. Adamo, J. Jaramillo, R. Gomperts, R. E. Stratmann, O. Yazyev, A. J. Austin, R. Cammi, C. Pomelli, J. W. Ochterski, R. L. Martin, K. Morokuma, V. G. Zakrzewski, G. A. Voth, P. Salvador, J. J. Dannenberg, S. Dapprich, A. D. Daniels, O. Farkas, J. B. Foresman, J. V. Ortiz, J. Cioslowski, and D. J. Fox, *Gaussian 09, Revision D.01*, Gaussian, Inc., Wallingford CT, 2013.

(2) A. D. Becke, *J. Chem. Phys.*, 1993, **98**, 1372-1377.
